# Supplementary material
Source: HighWire-hosted journal article supplement (https://bmjleader.bmj.com/highwire/filestream/1645/field_highwire_adjunct_files/1/leader-2020-000224supp002_data_supplement.pdf)
Supplement: leader-2020-000224supp002_data_supplement.pdf [file leader-2020-000224supp002_data_supplement.pdf]

**Supplementary file 2. Search terms for organisation journals**

| <b>Search</b>                                                                                                                                    | <b>Journal</b>                       | <b>Selected papers</b> | <b>Included after full text reading</b>                                  |
|--------------------------------------------------------------------------------------------------------------------------------------------------|--------------------------------------|------------------------|--------------------------------------------------------------------------|
| Health, medical, surgery, hospital, ehealth, telemedicine (abstract/subject)<br><br>Work in health AND technological change (filter: 2000- 2019) | Adm Scie Quartely                    | 3                      | Beane, 2019<br><br>Black, Carlile, Repenning, 2004<br><br>Edmonson, 2001 |
|                                                                                                                                                  | Organization Science                 | 2                      | Barret et al., 2012                                                      |
|                                                                                                                                                  | Academy of Management Journal        | 0                      | 0                                                                        |
|                                                                                                                                                  | Organizational Studies               | 0                      | 0                                                                        |
|                                                                                                                                                  | Human Relations                      | 3                      | Gherardi, 2010<br>Korica & Moloy, 2010<br>Nicolini, 2007                 |
|                                                                                                                                                  | Academy of Health Management Journal | 2                      | 0                                                                        |
